# Supplementary material
Source: PubMed Central journal article supplement (PMC6791317)
Supplement: supp_RA119.008053_143798_2_supp_378901_pw8r1s.pdf [file supp_RA119.008053_143798_2_supp_378901_pw8r1s.pdf]

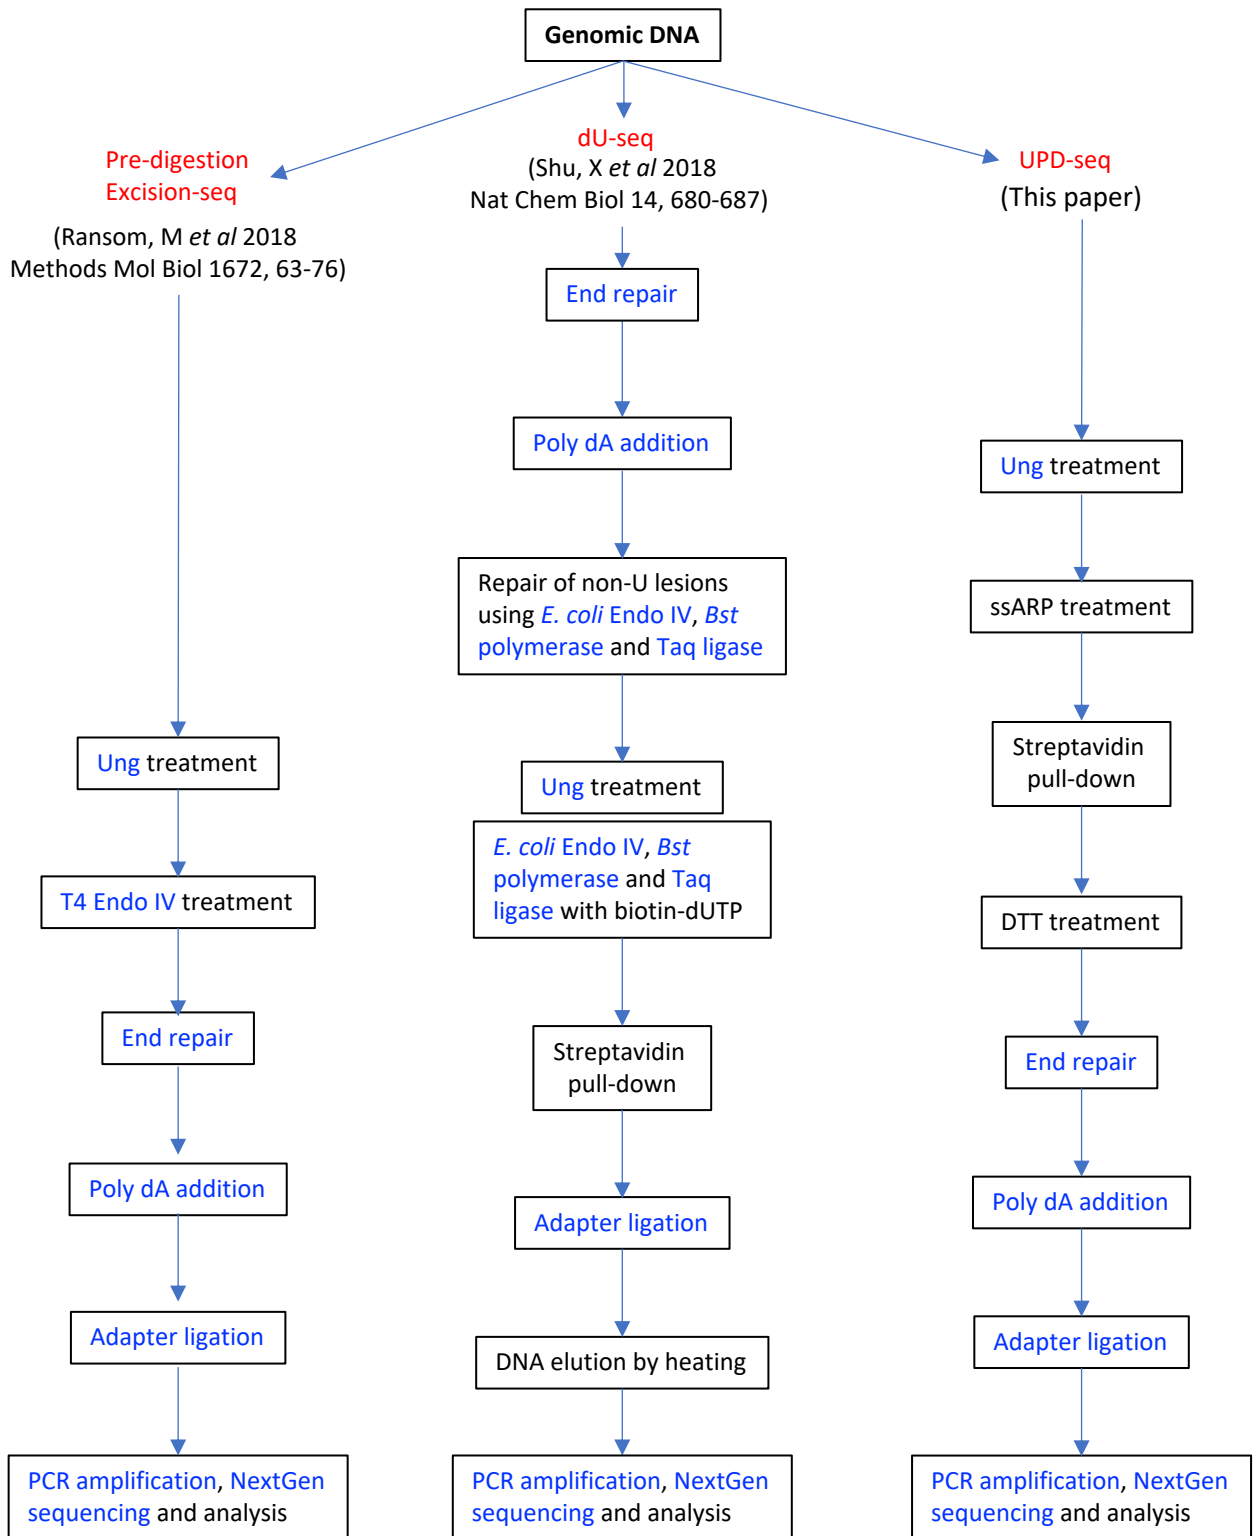

**Supplementary Fig. S1**  
**Comparison of methods for mapping genomic uracils**

The biochemical steps in different techniques for mapping genomic uracils are outlined. Enzymatic manipulations are shown in blue.

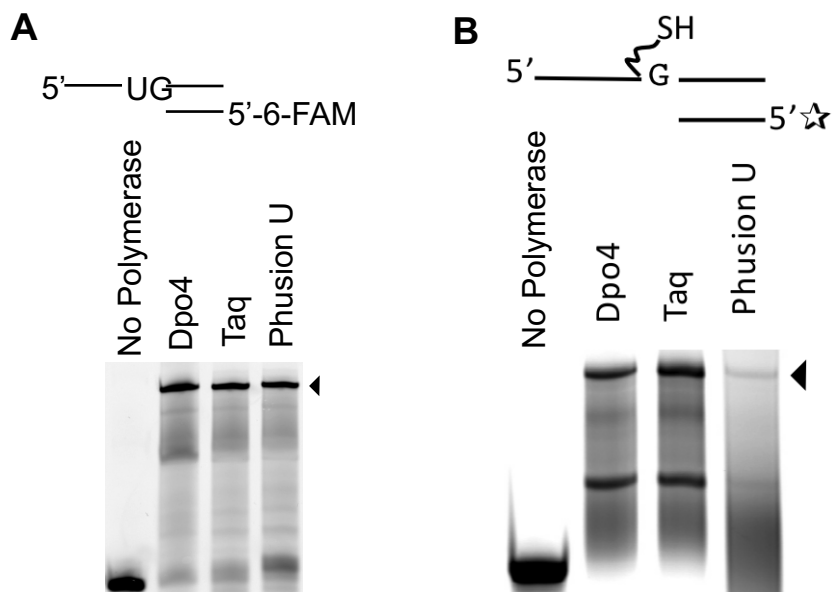

Supplementary Fig. S2

**Bypass of uracils and ssARP scar by DNA polymerases**

Primer extension with Dpo4, Taq and PhusionU polymerases across uracil (Part A) or the scar left behind after DTT treatment (Part B) in the template strand. The full-length product is indicated by a black triangle.

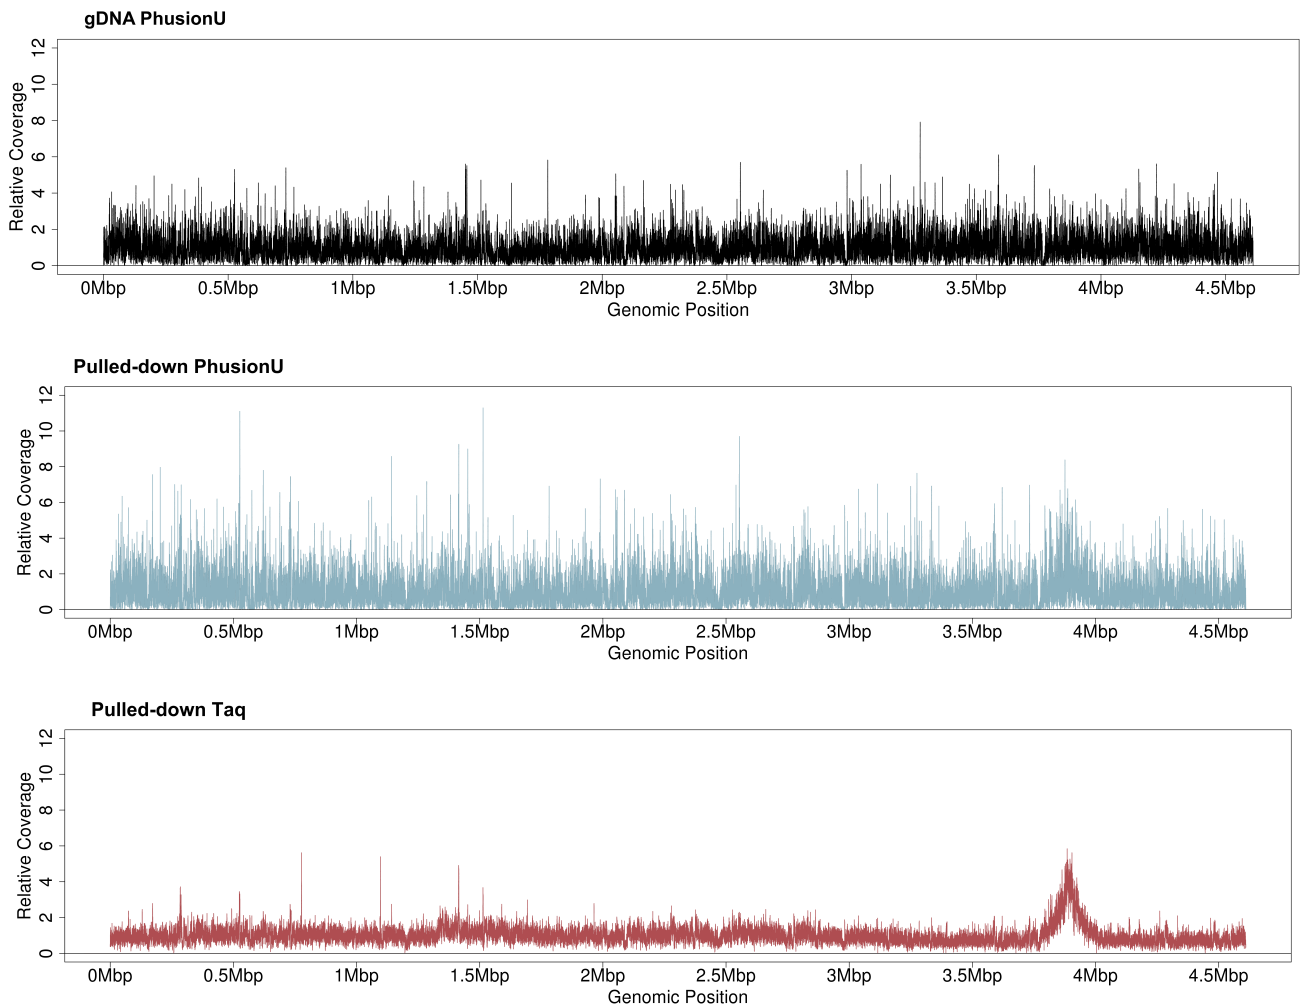

**Supplementary Fig. S3**

The tiled plots shown in Figure 1F are separated and shown one below the other.

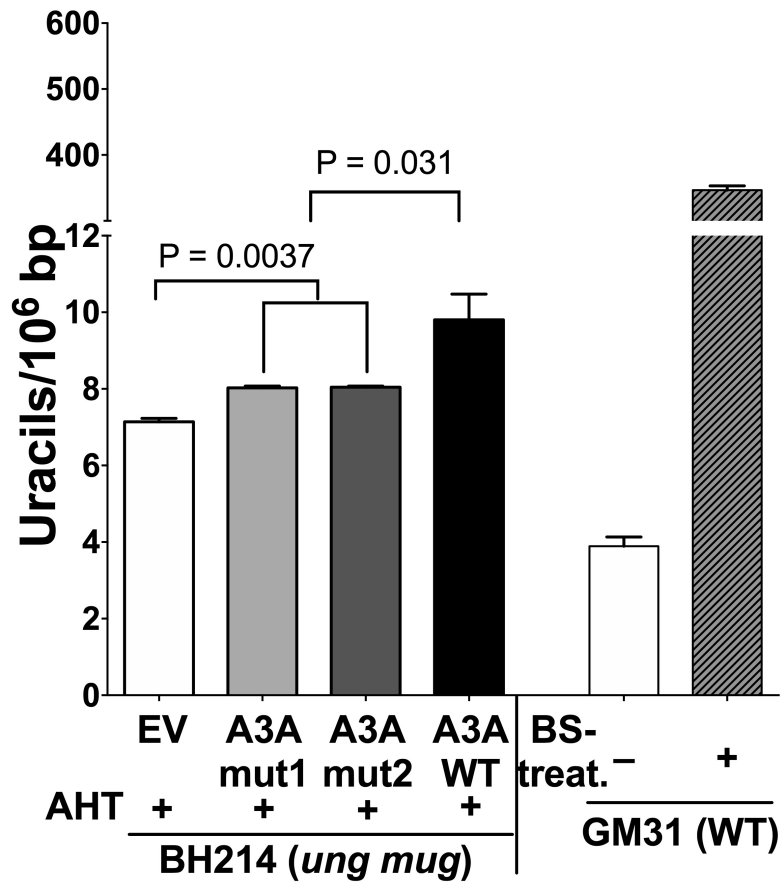

**Supplementary Fig. S4**

The uracil quantification assay was performed as described in the text. The A3A mut1 and A3A mut2 are uracil quantifications on DNA from independent cultures of BH214 cells expressing A3A-E72A mutant. EV- Empty vector. AHT- Anhydrotetracycline; BS-treat.- Bisulfite treatment. GM31 is DNA repair-proficient (*ung<sup>+</sup> mug<sup>+</sup>*), while BH214 is repair-deficient (*ung mug*).

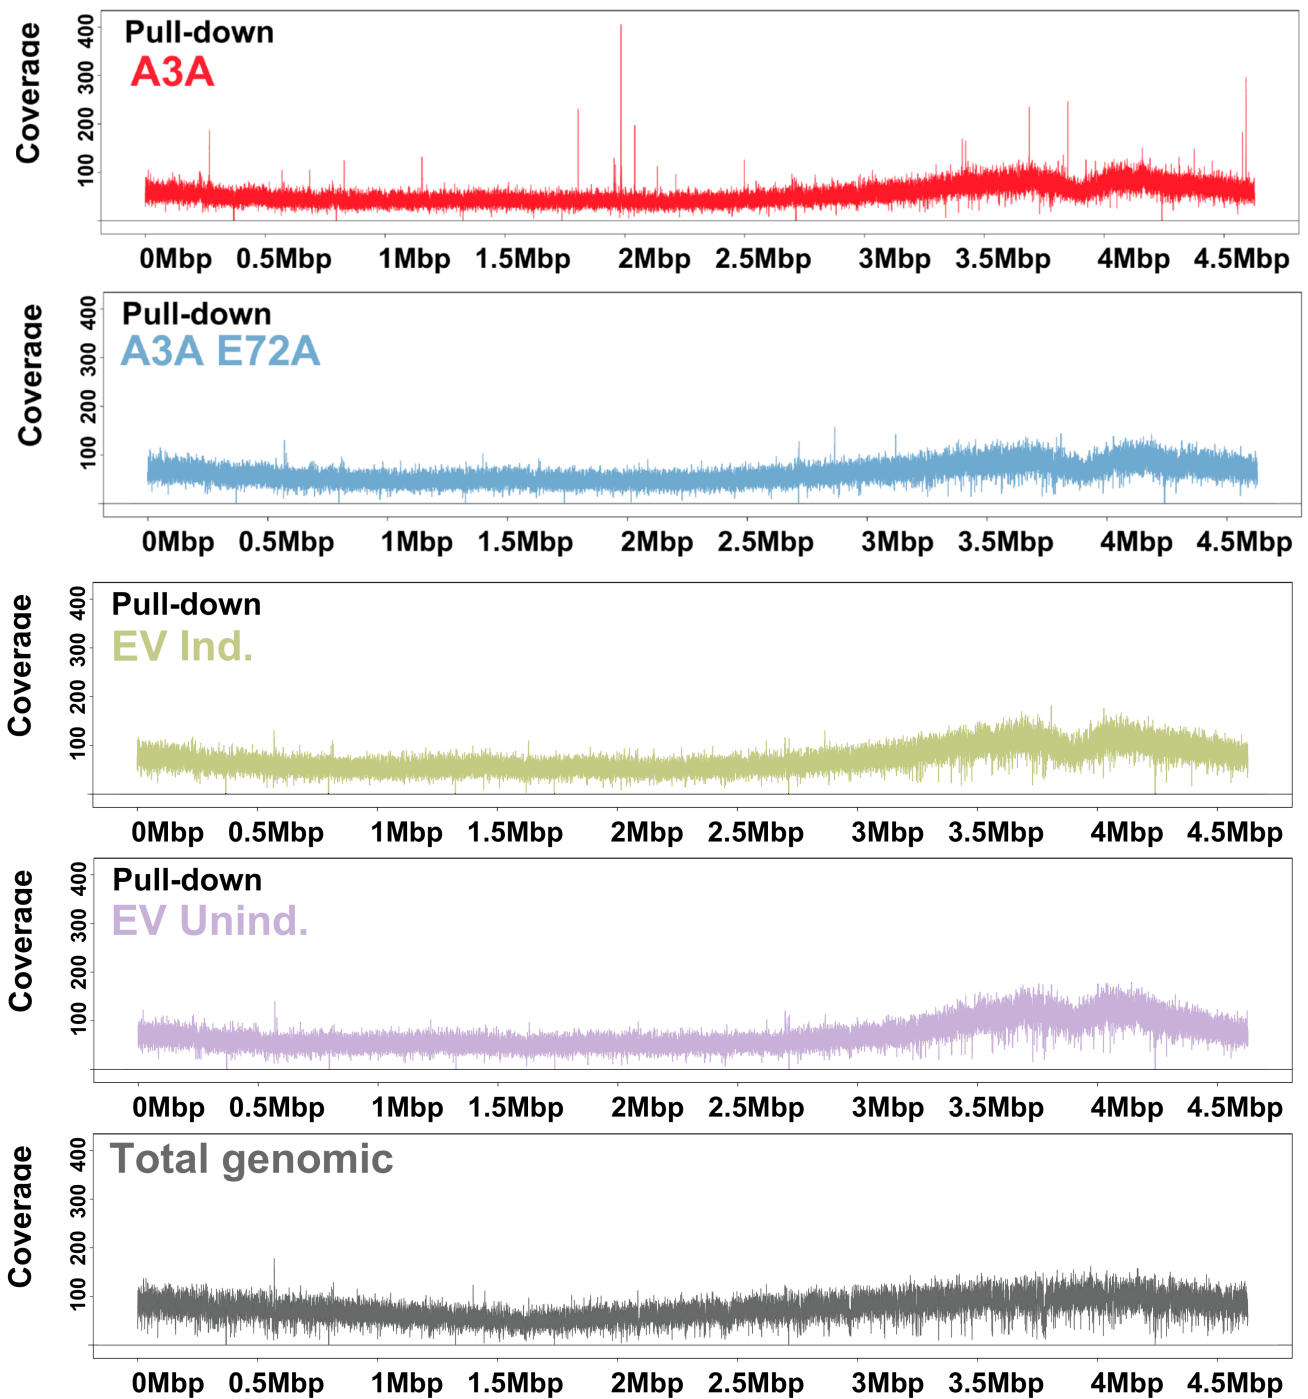

Supplementary Fig. S5

The tiled plots shown in Figure 2C are separated and shown one below the other.

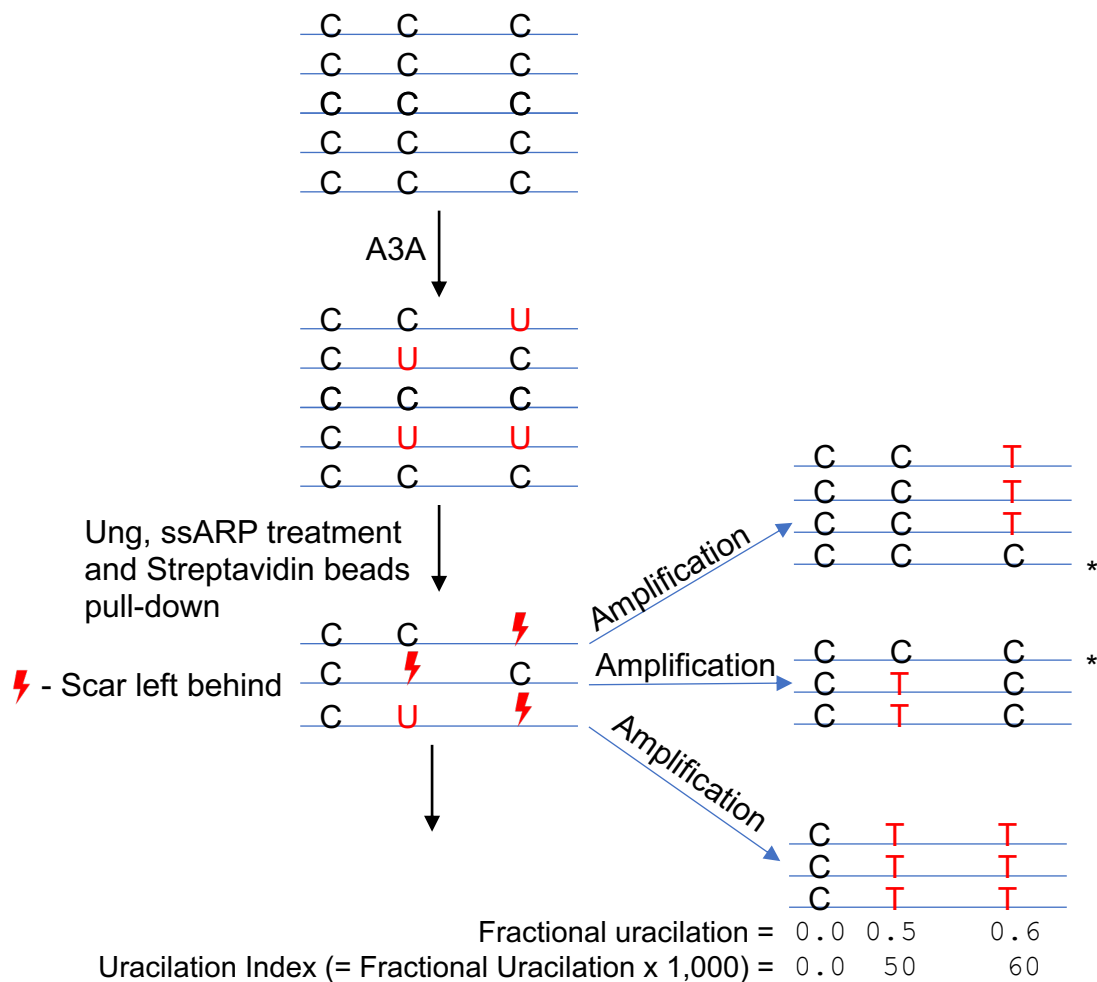

### Supplementary Fig. S6 Definition of Uracilation Index

Uracilation index is defined in the context of UPD-seq. A region in the *E. coli* genome with three cytosines that may be deaminated by A3A is shown in five independent cells. A3A converts cytosines in three of the molecules to uracils. Ung/ssARP/Streptavidin treatment pulls down only these three molecules and DTT treatment releases them from the streptavidin beads leaving behind a chemical scar. One of the uracils is not excised by Ung and is left intact. Amplification of the pull-down DNA inserts A across U and (in most cases) the scar, except when the polymerase inserts a guanine across a scar. The latter event restores the original cytosine. The uracilation index is defined as fractional uracilation at any site among all the sequenced molecules times 1,000.

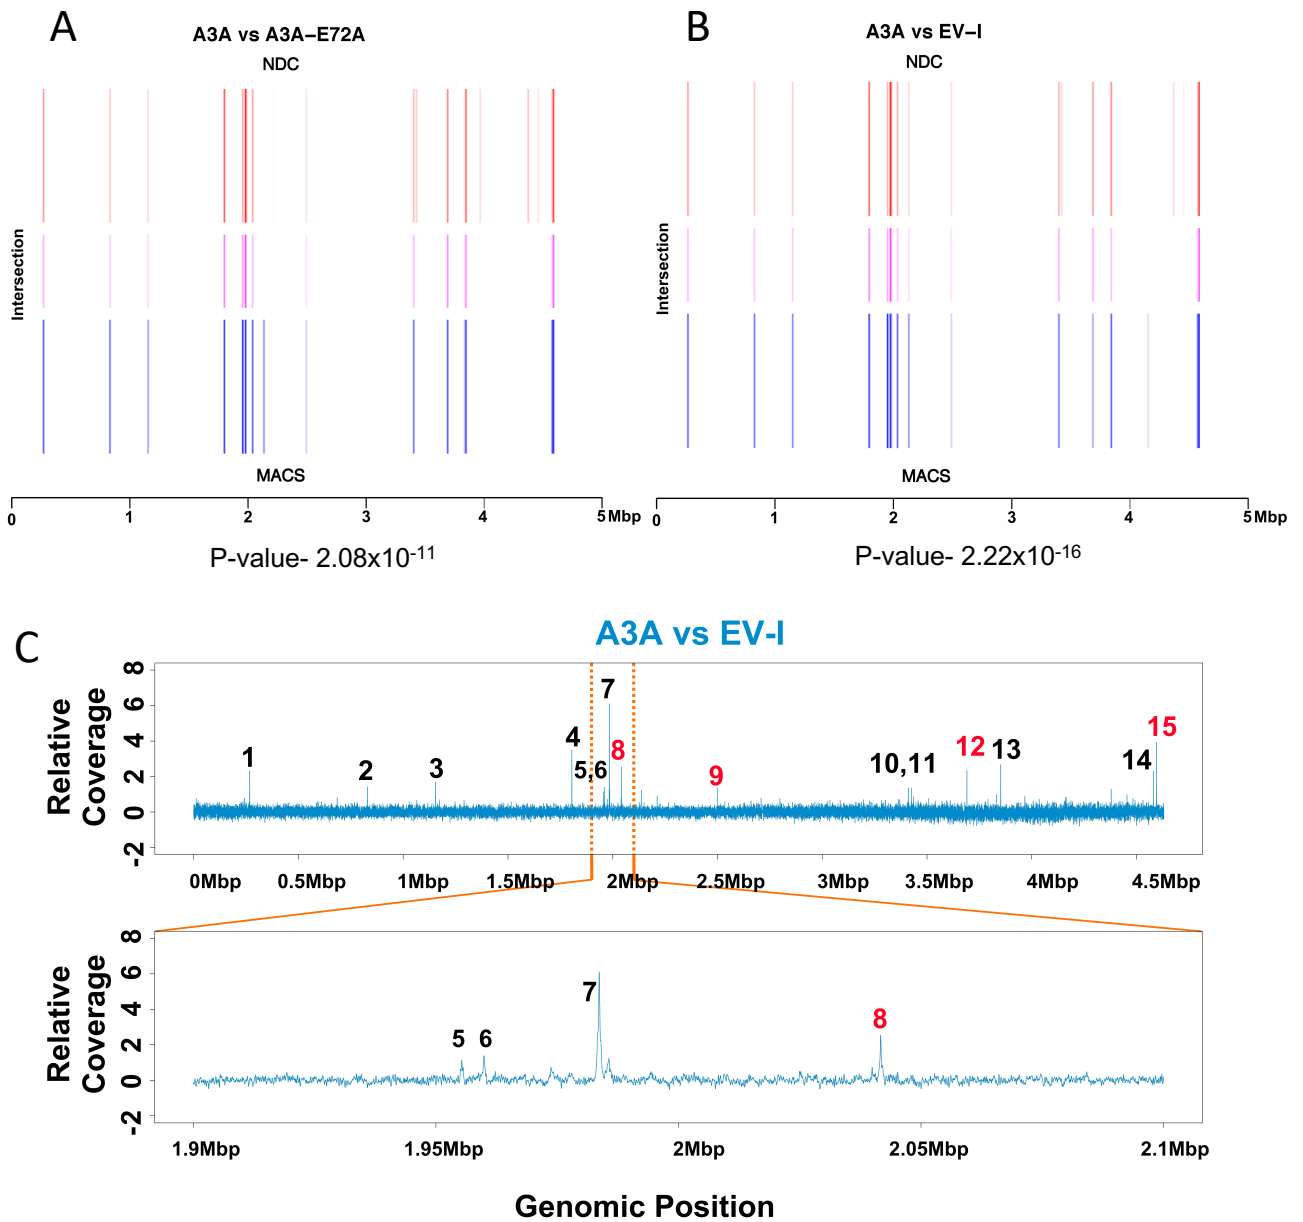

## Supplementary Fig S7

### Comparison of NDC and MACS generated peaks

R Package GenometriCorr was used to compare the peaks detected by different algorithms (NDC vs MACS). Top panel (red) shows the peaks detected using NDC , lower panel (blue) shows the peaks detected using MACS and the middle panel (pink) shows the intersection of these two sets of peaks. P-values for relative distances was calculated using Kolmogorov-Smirnov test and are shown below each plot. Peaks generated by comparing A3A with **(A)** A3A-E72A and **(B)** empty vector-induced as control libraries.

**(C)** Similar to Fig. 4A, NDC plot comparing A3A with empty vector-induced

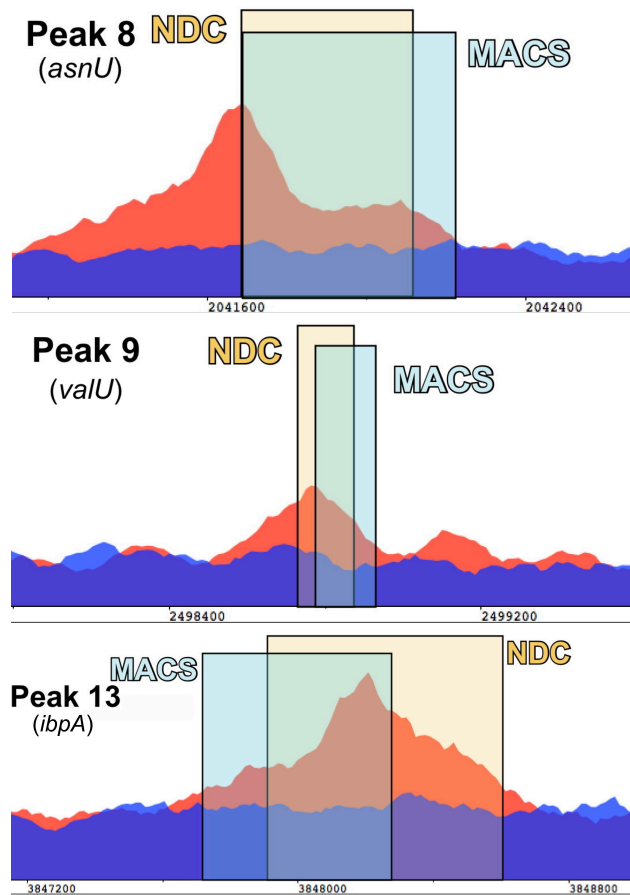

## Supplementary Fig. S8

### Comparison of individual peaks generated by NDC and MACS

Depth of coverage plots of UPD-Seq libraries A3A (red) and A3A-E72A (blue) around peak 8 , peak 9 and peak 13. Blue and yellow boxes show the genomic regions that were detected as a peak using NDC algorithm or MACS software.



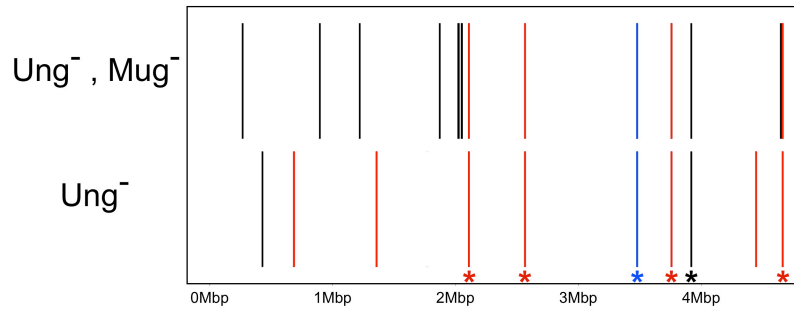

## Supplementary Fig. S9

### Comparison of uracilated peaks in BH214 and BH212 genomes

BH214 is *ung<sup>-</sup> mug<sup>-</sup>*, while BH212 is *ung<sup>-</sup> mug<sup>+</sup>*

Red is a tRNA gene, blue is an rRNA gene and black is a CDS

Uracilated peaks common in the two strains are identified by asterisks (\*)

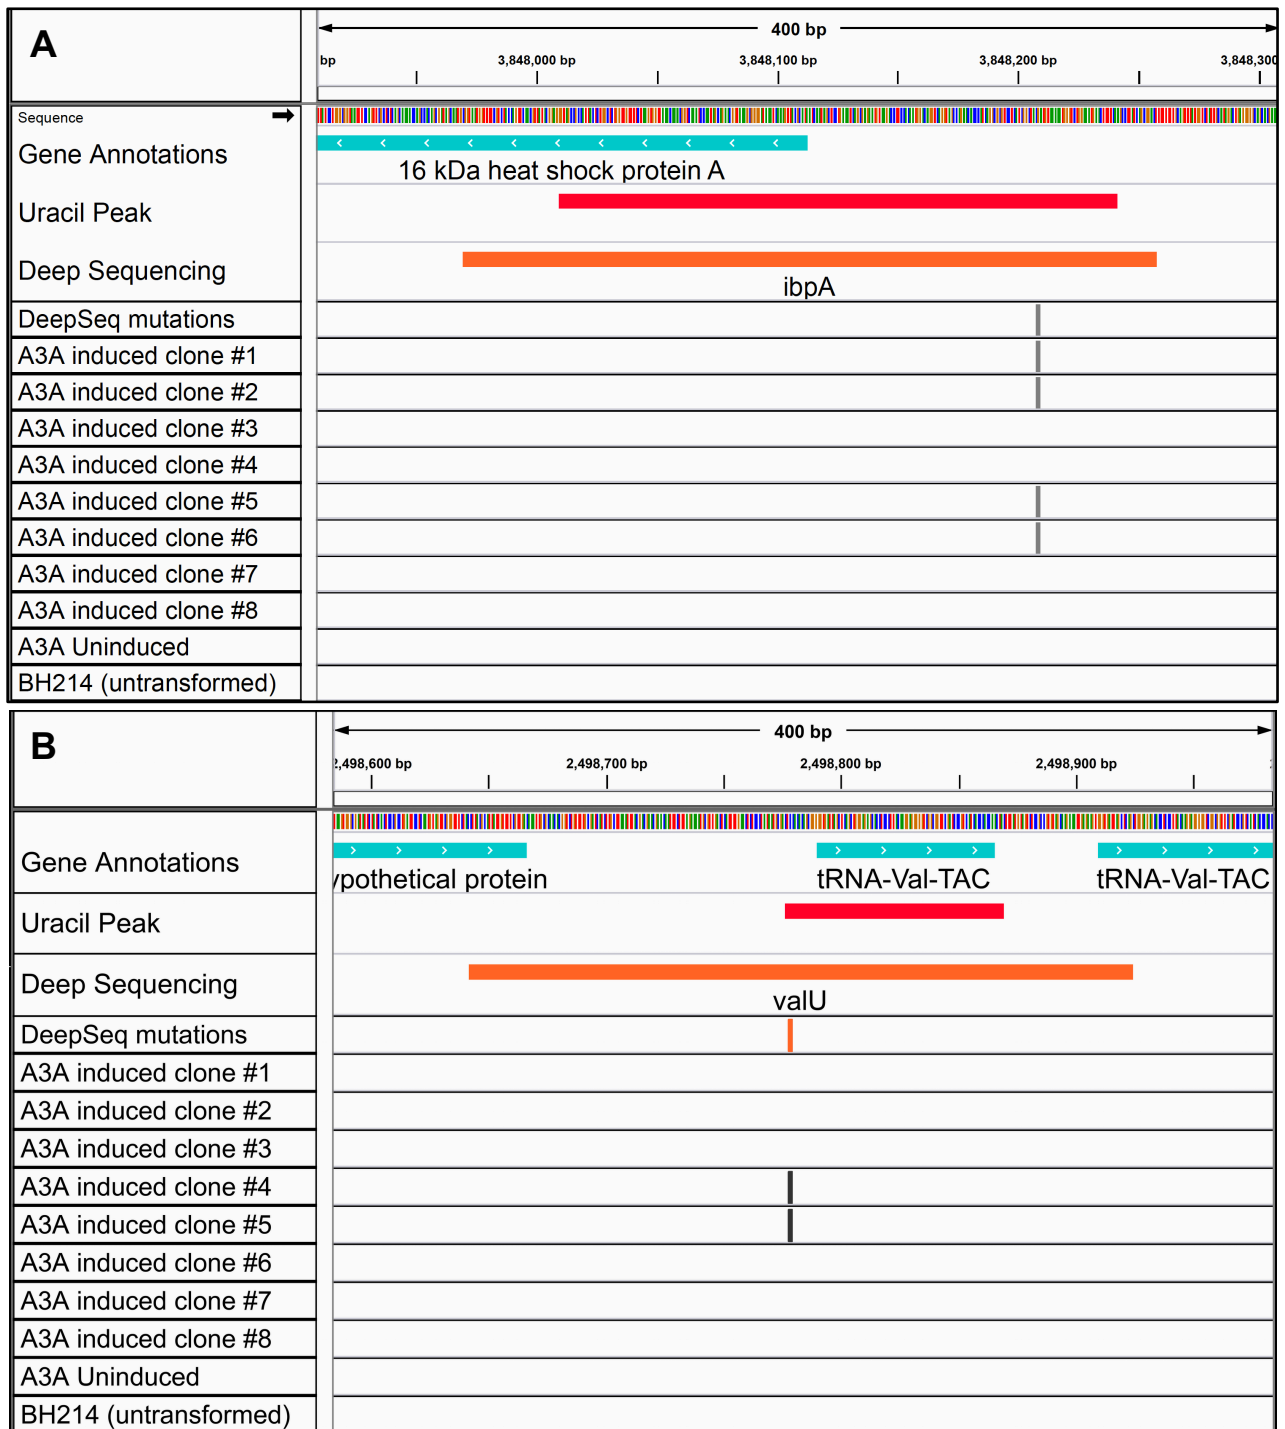

Supplementary Fig. S10

IGV visualization of 400 bp region around *ibpA* and *valU* genes. Successive lines show the span of the uracilation peak (red), the deep sequenced region (orange) and the position of the C to T changes in uracilation (orange) and mutations in whole genome sequence of eight independent clones expressing A3A (black), one clone with no induction of A3A and one clone without A3A.

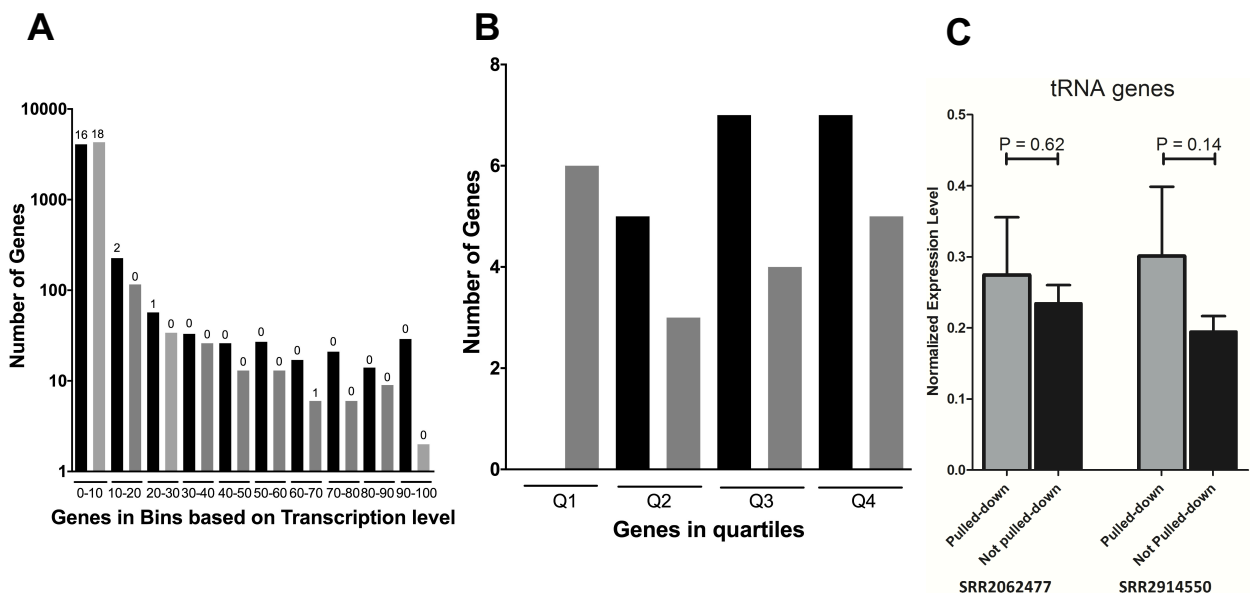

## Supplementary Fig. S11

### Relationship between transcription and preferential targeting by A3A

**(A)** All *E. coli* genes are divided into 10 bins based on level of transcription. Bars represent the number of genes found in each bin. Number of genes detected in the pull-down experiments are shown above each bar. Most of the pull-down genes are in the 10th percentile of genes based on their transcription levels. The two datasets used were SRR2062477 and SRR2914550.

**(B)** *E. coli* genes were sorted based on transcription levels and divided into quartiles (equal numbers). Number of pulled-down genes in each quartile are shown with bars.

**(C)** Comparison of transcription levels tRNA genes that were pulled down from BH214 and BH212 genomic DNAs with those that were not pulled down.

**A**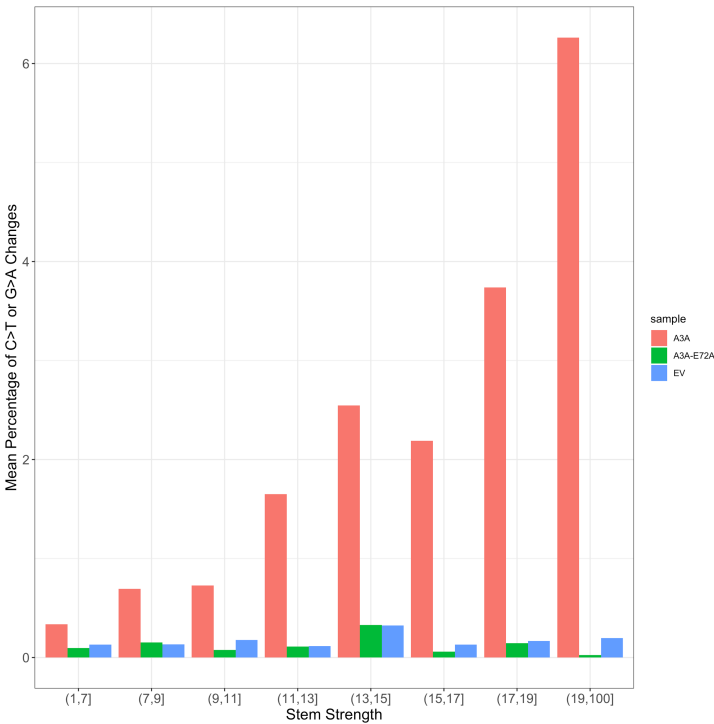**B**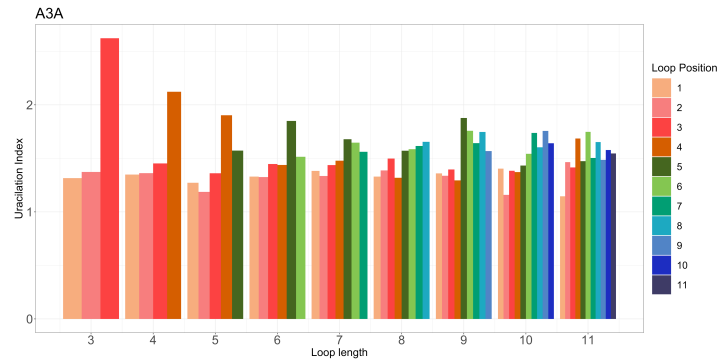**C**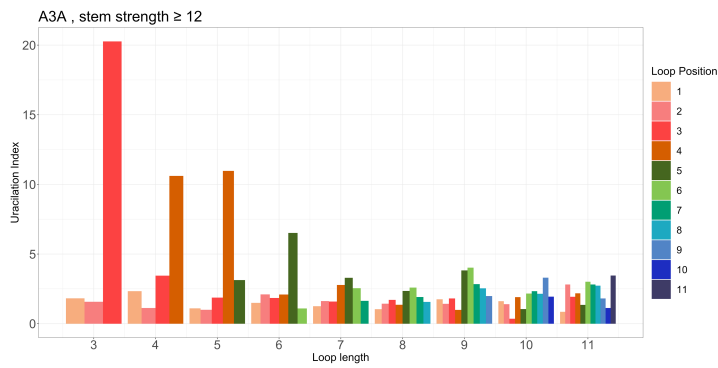

## Supplementary Fig. S12

**A.** Uracilation Index of predicted hairpins in 3 UPD-seq libraries grouped by a range of hairpin stem strengths (strength >1 through 7, >7 through 9 etc)

**B and C.** Uracilation Index in the A3A UPD-seq library grouped by hairpin loop length and the position of the cytosine within the loop, for all TC dinucleotides (**B**) and TC dinucleotides with a hairpin stem strength  $\geq 12$  (**C**).

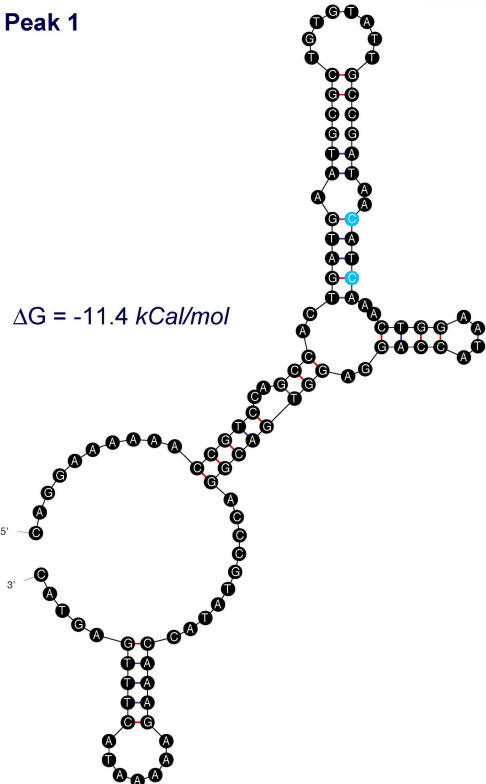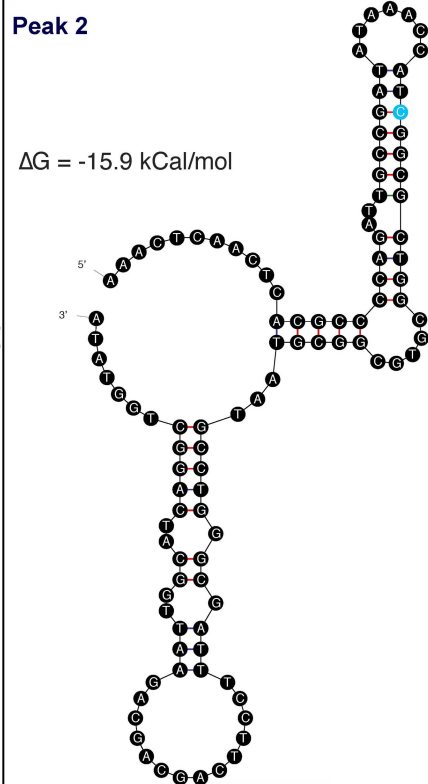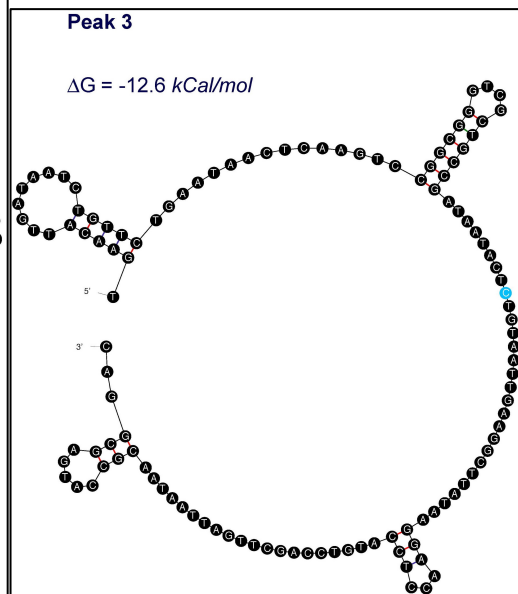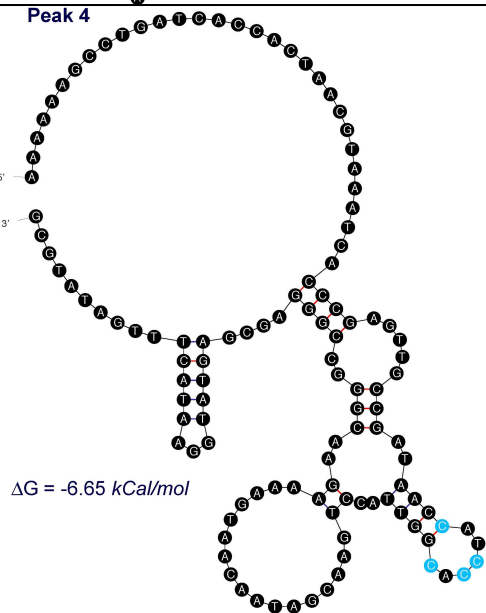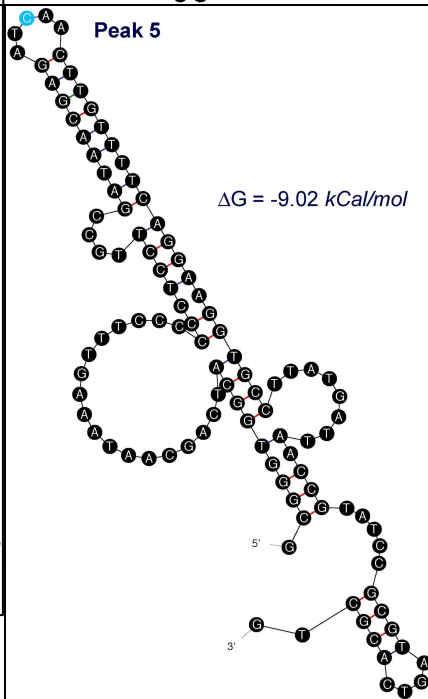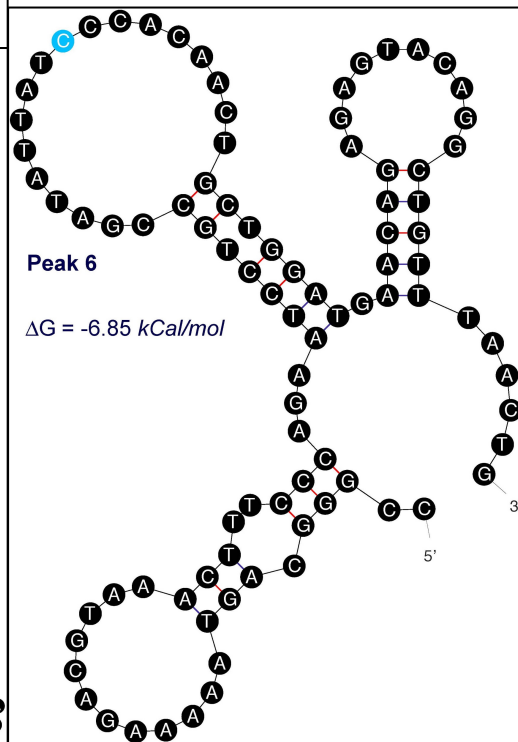

**Supplementary Fig. S13**  
**Part 1**



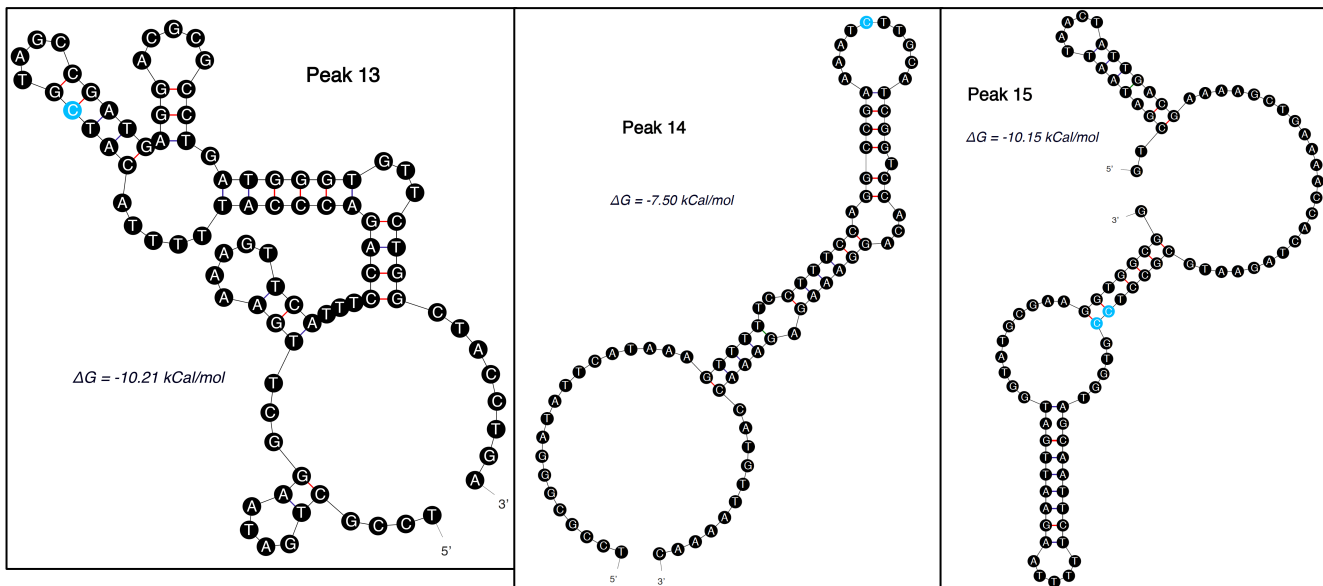

### Supplementary Fig. S13 Part 3

Secondary structures of DNA sequences within uracilation peaks predicted by Mfold using the default parameters. The white bases on blue background (C) are most frequently read as T in UPD-seq.
